# Supplementary material
Source: HighWire-hosted journal article supplement (https://bjsm.bmj.com/content/58/7/382)
Supplement: inline-supplementary-material-2 [file inline-supplementary-material-2.pdf]

**Supplementary Table 2** Secondary outcome measures

| <b>Outcome</b>                                                          | <b>Measurement/tool</b>                                                 | <b>Follow-up (after randomisation)</b> |
|-------------------------------------------------------------------------|-------------------------------------------------------------------------|----------------------------------------|
| Proportion of fallers                                                   | Monthly calendars                                                       | 12 months                              |
| Time spent in sedentary, light, moderate and vigorous physical activity | ActiGraph                                                               | 6 & 12 months                          |
| Daily steps                                                             | ActiGraph                                                               | 6 & 12 months                          |
| Physical activity-related goal attainment                               | Goal Attainment Scale <sup>49</sup>                                     | 3, 6 & 12 months                       |
| Body mass index                                                         | Self-reported height and weight                                         | 3, 6 & 12 months                       |
| Eating habits                                                           | Questions from the Australian Health Survey <sup>26</sup>               | 3, 6 & 12 months                       |
| Quality of life                                                         | EQ-5D-5L <sup>23</sup>                                                  | 3, 6 & 12 months                       |
| Fear of falling                                                         | Short form Falls Efficacy Scale International <sup>27</sup>             | 3, 6 & 12 months                       |
| Mood                                                                    | Positive and Negative Affect Schedule <sup>28</sup>                     | 3, 6 & 12 months                       |
| Risk-taking behaviour                                                   | 5-item self-report tool <sup>30</sup>                                   | 3, 6 & 12 months                       |
| Well-being                                                              | 26-item composite scale of wellbeing (the COMPAS-W scale) <sup>22</sup> | 3, 6 & 12 months                       |
| Mobility-related confidence                                             | Modified Gait Efficacy Scale <sup>29</sup>                              | 3, 6 & 12 months                       |
| Self-reported physical activity                                         | Incidental and Planned Exercise Questionnaire <sup>21</sup>             | 3, 6 & 12 months                       |
| Disability                                                              | WHO Disability Assessment Schedule II <sup>24</sup>                     | 3, 6 & 12 months                       |
