# Supplementary material
Source: HighWire-hosted journal article supplement (https://bjsm.bmj.com/content/58/7/382)

Supplementary Figure 2 Forest plot of intervention effect on falls by history of falls and physical activity levels at baseline

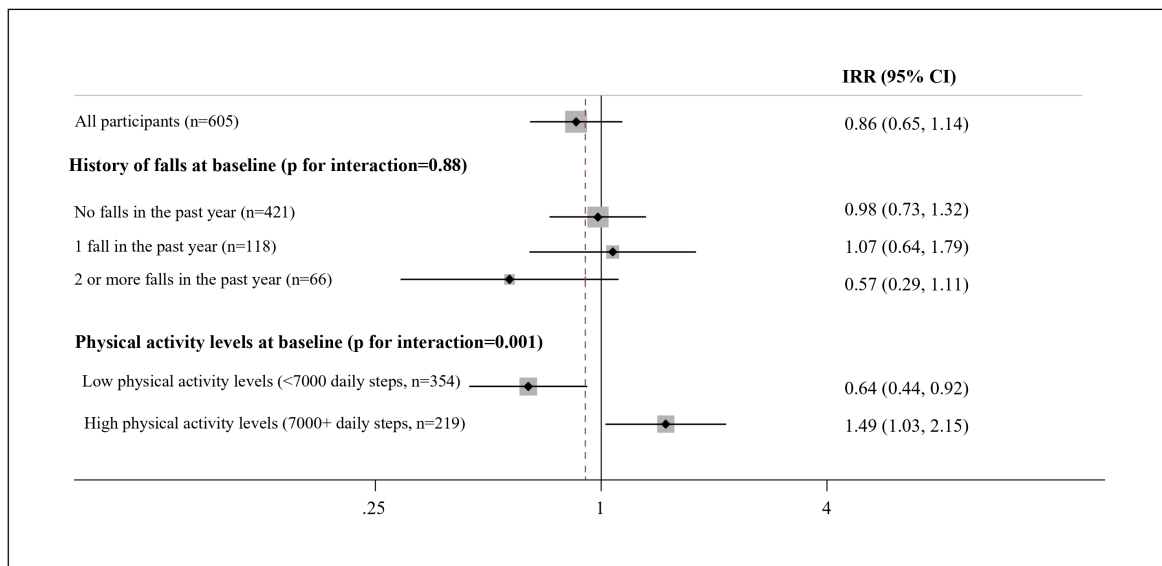

Supplement: inline-supplementary-material-3 [file inline-supplementary-material-3.pdf]
