# Supplementary material
Source: HighWire-hosted journal article supplement (https://bjsm.bmj.com/content/58/7/382)
Supplement: inline-supplementary-material-4 [file inline-supplementary-material-4.pdf]

**Supplementary Table 3** Mean difference (95% CI; p-value) or RR (95% CI) between intervention and control groups after adjusting for minimisation variables<sup>^</sup>

| Outcome measures                                                                           | Difference between groups<br>(baseline adjusted) or risk ratio        |                                                                       |                                                                        |
|--------------------------------------------------------------------------------------------|-----------------------------------------------------------------------|-----------------------------------------------------------------------|------------------------------------------------------------------------|
|                                                                                            | Month 3 minus month 0 (n=556)<br>Int minus Con or Int relative to Con | Month 6 minus month 0 (n=540)<br>Int minus Con or Int relative to Con | Month 12 minus month 0 (n=509)<br>Int minus Con or Int relative to Con |
| <b>CPM from accelerometer</b>                                                              | Not assessed                                                          | 18.09 (1.35 to 34.83; 0.03) <sup>a</sup>                              | 4.78 (-20.26 to 29.83; 0.70) <sup>b</sup>                              |
| <b>Daily steps</b>                                                                         | Not assessed                                                          | 558 (248 to 868; <0.001)                                              | 429 (20 to 840; 0.04)                                                  |
| <b>IPEQ (hours/week)</b>                                                                   |                                                                       |                                                                       |                                                                        |
| Incidental activity                                                                        | -1.20 (-3.26 to 0.85; 0.25)                                           | -0.73 (-3.01 to 1.54; 0.53)                                           | 0.87 (-2.02 to 3.76; 0.56)                                             |
| Walking activity                                                                           | 1.02 (0.22 to 1.82; 0.01)                                             | 0.89 (0.16 to 1.63; 0.02)                                             | 1.11 (0.50 to 1.72; <0.001)                                            |
| Planned activity                                                                           | 1.49 (0.48 to 2.50; 0.004)                                            | 0.87 (0.09 to 1.64; 0.03)                                             | 1.40 (0.47 to 2.34; 0.003)                                             |
| Planned walking activities                                                                 | 0.79 (0.12 to 1.46; 0.02)                                             | 0.53 (0.09 to 0.98; 0.02)                                             | 0.84 (0.28 to 1.39; 0.003)                                             |
| Planned sport activities                                                                   | 0.55 (-0.80 to 1.19; 0.09)                                            | 0.37 (-0.17 to 0.90; 0.18)                                            | 0.63 (0.09 to 1.18; 0.02)                                              |
| Total score                                                                                | 0.16 (-1.88 to 2.18; 0.88)                                            | 0.09 (-2.43 to 2.62; 0.94)                                            | 2.30 (-0.43 to 5.02; 0.10)                                             |
| <b>Device-measured sedentary, light, and moderate to vigorous physical activity (MVPA)</b> |                                                                       |                                                                       |                                                                        |
| Sedentary (minutes/week)*                                                                  | Not assessed                                                          | 7.34 (-12.73 to 27.42; 0.47)                                          | 20.35 (-8.45 to 49.16; 0.16)                                           |
| Light intensity (minutes/week)*                                                            | Not assessed                                                          | 8.38 (-3.51 to 20.27; 0.17)                                           | 7.39 (-4.36 to 19.15; 0.22)                                            |
| MVPA (minutes/week)*                                                                       | Not assessed                                                          | 26.66 (9.07 to 44.25; 0.003)                                          | 7.23 (-18.64 to 33.11; 0.58)                                           |
| <b>Meet recommendation of 150 min per week of MVPA<sup>#</sup></b>                         | Not assessed                                                          | 1.18 (0.93 to 1.50; 0.16)                                             | 1.02 (0.80 to 1.32; 0.85)                                              |
| <b>COMPAS-W scale (raw score 26-130)*</b>                                                  | 1.05 (-0.11 to 2.22; 0.08)                                            | 1.49 (0.21 to 2.77; 0.02)                                             | 1.14 (-0.15 to 2.43; 0.08)                                             |
| <b>EQ-5D-5L quality of life</b>                                                            |                                                                       |                                                                       |                                                                        |
| Health utility score (-0.68 to 1)                                                          | 0.03 (0.008 to 0.05; 0.007)                                           | 0.03 (0.004 to 0.05; 0.02)                                            | 0.02 (-0.006 to 0.04; 0.14)                                            |
| VAS score (0-100)                                                                          | 1.22 (-0.57 to 2.99; 0.18)                                            | 1.22 (-0.83 to 3.28; 0.24)                                            | 1.9 (0.24 to 3.54; 0.02)                                               |
| <b>WHO Disability Assessment Schedule 2.0 (raw score 12-60)<sup>§</sup></b>                | -0.20 (-0.68 to 0.29; 0.43)                                           | -0.48 (-1.07 to 0.09; 0.1)                                            | -0.64 (-1.22 to -0.05; 0.04)                                           |
| <b>Australian Dietary Guidelines</b>                                                       |                                                                       |                                                                       |                                                                        |
| Number of vegetables serves                                                                | -0.39 (-0.58 to -0.19; <0.001)                                        | -0.22 (-0.45 to 0.01; 0.06)                                           | -0.23 (-0.44 to -0.02; 0.03)                                           |
| Number of fruits serves                                                                    | -0.10 (-0.25 to 0.035 0.18)                                           | -0.15 (-0.30 to 0.01; 0.08)                                           | -0.01 (-0.16 to 0.14; 0.89)                                            |
| <b>BMI</b>                                                                                 | Not assessed                                                          | -0.05 (-0.36 to 0.26; 0.75)                                           | 0.25 (-0.02 to 0.53; 0.07)                                             |

**Supplementary Table 3** Mean difference (95% CI; p-value) or RR (95% CI) between intervention and control groups after adjusting for minimisation variables<sup>^</sup>

| Outcome measures                                         | Difference between groups<br>(baseline adjusted) or risk ratio        |                                                                       |                                                                        |
|----------------------------------------------------------|-----------------------------------------------------------------------|-----------------------------------------------------------------------|------------------------------------------------------------------------|
|                                                          | Month 3 minus month 0 (n=556)<br>Int minus Con or Int relative to Con | Month 6 minus month 0 (n=540)<br>Int minus Con or Int relative to Con | Month 12 minus month 0 (n=509)<br>Int minus Con or Int relative to Con |
| <b>Falls efficacy scale (7-28)<sup>§</sup></b>           | -0.26 (-0.64 to 0.12; 0.18)                                           | -0.25 (-0.57 to 0.07; 0.12)                                           | -0.36 (-0.74 to 0.02; 0.06)                                            |
| <b>PANAS scale, (10-50)</b>                              |                                                                       |                                                                       |                                                                        |
| Positive Affect Score                                    | -0.21 (-1.26 to 0.84; 0.70)                                           | 0.82 (-0.22 to 1.85; 0.12)                                            | 0.71 (-0.42 to 1.85; 0.22)                                             |
| Negative Affect Score                                    | 0.13 (-0.51 to 0.76; 0.69)                                            | 0.27 (-0.45 to 0.98; 0.47)                                            | -0.04 (-0.72 to 0.64; 0.91)                                            |
| <b>Modified Gait Efficacy Scale (10-100)<sup>*</sup></b> | 0.10 (-1.29 to 1.48; 0.89)                                            | 1.56 (-0.004 to 3.13; 0.05)                                           | 1.26 (-0.11 to 2.63; 0.07)                                             |
| <b>Risk-taking behaviour (5-20)<sup>†</sup></b>          | 0.12 (-0.15 to 0.39; 0.38)                                            | 0.25 (-0.03 to 0.53; 0.07)                                            | -0.11 (-0.43 to 0.20; 0.48)                                            |

Shaded row = co-primary outcome

<sup>^</sup>Minimisation variables: rural/ urban location, the cluster's socioeconomic status, and whether the cluster meeting purpose involved physical activity.<sup>a</sup>n=515, <sup>b</sup>n=488

RR: Risk Ratio, Int=intervention group, Con= control group, CPM: Counts per minute, Incidental and Planned Exercise Questionnaire MVPA: Moderate to vigorous physical activity, BMI=Body Mass Index, PANAS: Positive and Negative Affect Schedule (Positive affect subscale score), COMPASS=composite scale of wellbeing.

<sup>\*</sup>Accelerometer-based measures; <sup>#</sup>Risk ratio; <sup>§</sup>Lower scores indicate better performance; <sup>†</sup>Higher scores indicate lower levels of concerning about falls.
